# Supplementary material for: Methylomic survival predictors, frailty, and mortality
Source: publisher site journal article supplement (doi:10.18632/aging.101392), 2018-03-06
Supplement: Supplementary file [file aging-v10i3-101392-supplementary-material-SD1.pdf]

**SUPPLEMENTARY MATERIAL**

**Table S1. Deficits included in the frailty index.**

| Deficits                                                                                                    |                                                                                                                                                                                                                                                                                                                                                                                                                                                                                                                                                                                                                                                                                                          |
|-------------------------------------------------------------------------------------------------------------|----------------------------------------------------------------------------------------------------------------------------------------------------------------------------------------------------------------------------------------------------------------------------------------------------------------------------------------------------------------------------------------------------------------------------------------------------------------------------------------------------------------------------------------------------------------------------------------------------------------------------------------------------------------------------------------------------------|
| <ul style="list-style-type: none"> <li>poor self-rated general health</li> </ul>                            |                                                                                                                                                                                                                                                                                                                                                                                                                                                                                                                                                                                                                                                                                                          |
| <ul style="list-style-type: none"> <li>history of various diseases (11 items)</li> </ul>                    | myocardial infarction<br>angina pectoris<br>heart failure<br>stroke<br>hypertension<br>hyperlipidemia<br>diabetes<br>cataract<br>glaucoma<br>gout<br>cancer                                                                                                                                                                                                                                                                                                                                                                                                                                                                                                                                              |
| <ul style="list-style-type: none"> <li>difficulties in the activities of daily living (16 items)</li> </ul> | “vigorous activities”<br>“climbing several flights of stairs”<br>“climbing one flight of stairs”<br>“walking more than one mile”<br>“walking several blocks”<br>“walking one block”<br>“moderate activities, such as moving a table, pushing a vacuum cleaner, bowling, or playing golf”<br>“lifting or carrying groceries”<br>“bathing or dressing yourself”<br>“bending, kneeling or stooping”<br>“limits in normal work or activities due to pain”<br>“accomplished less work or activities due to impaired physical health”<br>“limits in type of work or activities due to impaired physical health”<br>“difficulties chewing hard food”<br>“difficulties chewing meat”<br>“short-term memory loss” |
| <ul style="list-style-type: none"> <li>symptoms (6 items)</li> </ul>                                        | under-/overweight<br>pyrosis<br>shiver<br>insomnia<br>costiveness<br>aconuresis                                                                                                                                                                                                                                                                                                                                                                                                                                                                                                                                                                                                                          |

**Table S2. Associations between individual mortality-related CpGs and frailty index.**

| CpG sites  | Gene name         | Subset I (n=993)                  |          | Subset II (n=858)                 |          | Subset III (n=470)                |         | Overall (meta-analysis)           |          |          |
|------------|-------------------|-----------------------------------|----------|-----------------------------------|----------|-----------------------------------|---------|-----------------------------------|----------|----------|
|            |                   | Coefficient (95% CI) <sup>a</sup> | p-value  | Coefficient (95% CI) <sup>a</sup> | p-value  | Coefficient (95% CI) <sup>a</sup> | p-value | Coefficient (95% CI) <sup>a</sup> | p-value  | FDR      |
| cg01406381 | <i>SLC1A5</i>     | -10.03 (-13.84, -6.22)            | 2.43E-07 | -8.04 (-12.09, -4.00)             | 9.75E-05 | -12.83 (-20.15, -5.50)            | 0.0006  | -9.56 (-12.16, -6.97)             | 4.89E-13 | 2.84E-11 |
| cg07626482 | <i>SLC1A5</i>     | -6.90 (-10.26, -3.54)             | 5.79E-05 | -7.97 (-11.52, -4.41)             | 1.14E-05 | -6.05 (-10.70, -1.40)             | 0.0108  | -7.11 (-9.27, -4.95)              | 1.18E-10 | 3.42E-09 |
| cg19859270 | <i>GPR15</i>      | -9.76 (-14.83, -4.68)             | 0.0002   | -8.66 (-13.21, -4.11)             | 0.0002   | -5.63 (-12.39, 1.12)              | 0.1022  | -8.44 (-11.47, -5.41)             | 4.67E-08 | 9.02E-07 |
| cg19266329 |                   | -6.01 (-8.78, -3.25)              | 2.00E-05 | -3.61 (-6.46, -0.76)              | 0.013    | -4.70 (-9.13, -0.27)              | 0.0375  | -4.82 (-6.63, -3.01)              | 1.76E-07 | 2.56E-06 |
| cg25607249 | <i>SLC1A5</i>     | -6.44 (-10.25, -2.64)             | 0.0009   | -6.50 (-10.54, -2.46)             | 0.0016   | -5.72 (-13.04, 1.60)              | 0.1255  | -6.38 (-8.97, -3.78)              | 1.42E-06 | 1.65E-05 |
| cg12510708 | <i>NFE2L3</i>     | -5.46 (-8.13, -2.78)              | 6.45E-05 | -2.98 (-5.72, -0.24)              | 0.0328   | -4.18 (-8.78, 0.43)               | 0.0756  | -4.24 (-6.00, -2.47)              | 2.63E-06 | 2.18E-05 |
| cg23842572 | <i>MPRIIP</i>     | 6.08 (3.03, 9.13)                 | 9.23E-05 | 4.21 (1.11, 7.32)                 | 0.0077   | 2.85 (-2.61, 8.30)                | 0.3062  | 4.85 (2.83, 6.86)                 | 2.55E-06 | 2.18E-05 |
| cg03725309 | <i>SARS</i>       | -6.47 (-9.71, -3.23)              | 8.97E-05 | -4.36 (-7.70, -1.03)              | 0.0104   | -2.01 (-7.74, 3.73)               | 0.4930  | -4.96 (-7.12, -2.81)              | 6.29E-06 | 4.56E-05 |
| cg24704287 |                   | -3.43 (-5.80, -1.05)              | 0.0047   | -3.54 (-6.20, -0.88)              | 0.009    | -4.73 (-8.82, -0.64)              | 0.0235  | -3.68 (-5.30, -2.05)              | 9.32E-06 | 5.40E-05 |
| cg25189904 | <i>GNG12</i>      | -1.87 (-3.10, -0.64)              | 0.0029   | -1.57 (-2.96, -0.17)              | 0.0275   | -2.62 (-4.58, -0.66)              | 0.0088  | -1.90 (-2.73, -1.06)              | 8.49E-06 | 5.40E-05 |
| cg23190089 | <i>SLC22A18AS</i> | -8.24 (-12.96, -3.53)             | 0.0006   | -5.78 (-10.50, -1.06)             | 0.0165   | -6.91 (-15.85, 2.04)              | 0.1303  | -7.00 (-10.13, -3.87)             | 1.14E-05 | 6.00E-05 |
| cg05492306 | <i>ERCC1</i>      | -6.96 (-10.46, -3.45)             | 9.95E-05 | -3.27 (-6.69, 0.15)               | 0.0609   | -6.89 (-12.52, -1.25)             | 0.0166  | -5.41 (-7.98, -2.85)              | 3.60E-05 | 0.0002   |
| cg04987734 | <i>CDC42BPB</i>   | 2.98 (0.70, 5.27)                 | 0.0105   | 2.51 (0.11, 4.90)                 | 0.0403   | 5.45 (1.56, 9.33)                 | 0.0060  | 3.17 (1.65, 4.69)                 | 4.47E-05 | 0.0002   |
| cg14975410 |                   | -3.18 (-5.08, -1.29)              | 0.001    | -1.88 (-3.93, 0.17)               | 0.0726   | -2.63 (-5.52, 0.26)               | 0.0743  | -2.59 (-3.85, -1.34)              | 5.13E-05 | 0.0002   |
| cg03636183 | <i>F2RL3</i>      | -2.25 (-3.97, -0.52)              | 0.0106   | -2.30 (-4.06, -0.53)              | 0.0108   | -1.84 (-4.23, 0.55)               | 0.1314  | -2.18 (-3.28, -1.09)              | 9.62E-05 | 0.0004   |
| cg26470501 | <i>BCL3</i>       | -2.80 (-5.36, -0.24)              | 0.0321   | -3.57 (-6.28, -0.86)              | 0.0098   | -3.76 (-7.74, 0.21)               | 0.0635  | -3.27 (-4.96, -1.59)              | 0.0001   | 0.0005   |
| cg05575921 | <i>AHRR</i>       | -1.60 (-2.82, -0.38)              | 0.0102   | -1.78 (-3.02, -0.54)              | 0.005    | -0.52 (-2.40, 1.35)               | 0.5848  | -1.48 (-2.27, -0.69)              | 0.0002   | 0.0008   |
| cg07986378 | <i>ETV6</i>       | -3.68 (-5.90, -1.46)              | 0.0011   | -1.72 (-4.10, 0.65)               | 0.1551   | -2.87 (-6.66, 0.92)               | 0.1377  | -2.78 (-4.27, -1.29)              | 0.0002   | 0.0008   |
| cg06126421 |                   | -1.53 (-3.04, -0.02)              | 0.0465   | -3.04 (-4.56, -1.51)              | 9.34E-05 | -1.19 (-3.39, 1.01)               | 0.2892  | -2.04 (-3.17, -0.91)              | 0.0003   | 0.0011   |
| cg08362785 | <i>MKL1</i>       | 5.83 (2.10, 9.56)                 | 0.0022   | 3.82 (-0.34, 7.98)                | 0.0721   | 2.84 (-3.39, 9.07)                | 0.3722  | 4.59 (2.05, 7.13)                 | 0.0004   | 0.0011   |
| cg18181703 | <i>SOCS3</i>      | -5.16 (-7.47, -2.85)              | 1.18E-05 | -4.41 (-6.90, -1.93)              | 0.0005   | -1.03 (-4.50, 2.43)               | 0.5592  | -3.86 (-6.03, -1.68)              | 0.0005   | 0.0014   |
| cg00310412 | <i>SEMA7A</i>     | -5.64 (-8.44, -2.84)              | 7.82E-05 | -2.11 (-5.20, 0.98)               | 0.1805   | -4.53 (-9.36, 0.30)               | 0.0661  | -4.09 (-6.41, -1.77)              | 0.0005   | 0.0014   |
| cg23665802 | <i>MIR19A</i>     | -4.39 (-7.08, -1.69)              | 0.0014   | -1.81 (-4.44, 0.82)               | 0.1765   | -2.45 (-6.77, 1.88)               | 0.2671  | -2.97 (-4.69, -1.24)              | 0.0007   | 0.0019   |
| cg02657160 | <i>CPOX</i>       | -4.87 (-8.60, -1.14)              | 0.0105   | -2.38 (-5.99, 1.24)               | 0.1976   | -6.47 (-12.30, -0.64)             | 0.0297  | -4.06 (-6.43, -1.69)              | 0.0008   | 0.0019   |
| cg19572487 | <i>RARA</i>       | -4.04 (-6.08, -2.01)              | 9.76E-05 | -1.70 (-3.97, 0.57)               | 0.1422   | -1.81 (-5.08, 1.45)               | 0.2768  | -2.72 (-4.35, -1.10)              | 0.0010   | 0.0024   |
| cg01572694 | <i>MIR10A</i>     | -2.38 (-4.63, -0.13)              | 0.0381   | -2.61 (-4.99, -0.23)              | 0.0317   | -2.47 (-6.29, 1.35)               | 0.2050  | -2.49 (-3.99, -0.98)              | 0.0012   | 0.0027   |
| cg12513616 |                   | -3.15 (-5.81, -0.49)              | 0.0204   | -3.39 (-6.42, -0.35)              | 0.0287   | -0.89 (-5.10, 3.32)               | 0.6792  | -2.82 (-4.62, -1.01)              | 0.0023   | 0.0048   |
| cg26709988 | <i>CRISPLD2</i>   | -3.40 (-6.38, -0.42)              | 0.0256   | -1.96 (-5.15, 1.23)               | 0.2278   | -4.14 (-10.23, 1.95)              | 0.1824  | -2.89 (-4.94, -0.84)              | 0.0058   | 0.0120   |
| cg15342087 |                   | -2.32 (-5.60, 0.96)               | 0.1658   | -4.83 (-7.99, -1.66)              | 0.0028   | -0.59 (-5.79, 4.61)               | 0.8250  | -3.08 (-5.33, -0.84)              | 0.0071   | 0.0141   |

**Table S2.** continued.

| CpG sites  | Gene name         | Subset I (n=993)                  |          | Subset II (n=858)                 |         | Subset III (n=470)                |         | Overall (meta-analysis)           |         |        |
|------------|-------------------|-----------------------------------|----------|-----------------------------------|---------|-----------------------------------|---------|-----------------------------------|---------|--------|
|            |                   | Coefficient (95% CI) <sup>a</sup> | p-value  | Coefficient (95% CI) <sup>a</sup> | p-value | Coefficient (95% CI) <sup>a</sup> | p-value | Coefficient (95% CI) <sup>a</sup> | p-value | FDR    |
| cg25983901 |                   | -2.46 (-4.69, -0.22)              | 0.0310   | -2.01 (-4.28, 0.26)               | 0.0826  | 0.13 (-3.24, 3.50)                | 0.9390  | -1.81 (-3.24, -0.37)              | 0.0139  | 0.0269 |
| cg03707168 | <i>PPP1R15A</i>   | -2.50 (-5.07, 0.06)               | 0.0555   | -1.85 (-4.47, 0.76)               | 0.1643  | -1.18 (-5.68, 3.33)               | 0.6091  | -2.04 (-3.74, -0.35)              | 0.0182  | 0.0341 |
| cg26963277 | <i>KCNQ1OT1</i>   | -4.43 (-7.08, -1.78)              | 0.0011   | -0.80 (-3.48, 1.87)               | 0.5549  | -3.12 (-7.09, 0.84)               | 0.1220  | -2.74 (-5.09, -0.40)              | 0.0218  | 0.0394 |
| cg06905155 |                   | -1.63 (-4.21, 0.94)               | 0.2139   | -2.46 (-5.47, 0.55)               | 0.1087  | -2.22 (-6.48, 2.04)               | 0.3066  | -2.03 (-3.80, -0.25)              | 0.0256  | 0.0449 |
| cg18550212 | <i>ATL3</i>       | -4.43 (-7.24, -1.61)              | 0.0020   | -2.57 (-5.59, 0.45)               | 0.0951  | 0.66 (-4.41, 5.74)                | 0.7980  | -2.75 (-5.21, -0.29)              | 0.0284  | 0.0484 |
| cg24397007 | <i>FOSL2</i>      | -1.79 (-4.40, 0.83)               | 0.1802   | -1.40 (-4.21, 1.41)               | 0.3280  | -3.57 (-7.91, 0.76)               | 0.1064  | -1.93 (-3.68, -0.18)              | 0.0308  | 0.0511 |
| cg07123182 | <i>KCNQ1OT1</i>   | -4.15 (-8.55, 0.25)               | 0.0645   | -1.44 (-5.53, 2.66)               | 0.4910  | -3.68 (-9.42, 2.05)               | 0.2081  | -2.91 (-5.56, -0.25)              | 0.0319  | 0.0513 |
| cg11341610 | <i>CALR</i>       | -2.77 (-6.07, 0.53)               | 0.0996   | -2.18 (-5.47, 1.12)               | 0.1957  | -0.82 (-6.66, 5.02)               | 0.7830  | -2.25 (-4.41, -0.08)              | 0.0420  | 0.0641 |
| cg23079012 |                   | -2.86 (-6.05, 0.34)               | 0.0794   | -1.71 (-4.11, 0.69)               | 0.1624  | -0.55 (-3.74, 2.64)               | 0.7348  | -1.71 (-3.35, -0.06)              | 0.0419  | 0.0641 |
| cg01140244 | <i>INPP5A</i>     | 2.56 (-1.94, 7.05)                | 0.2650   | 3.97 (-0.59, 8.53)                | 0.0881  | 1.67 (-6.92, 10.26)               | 0.7024  | 3.06 (0.06, 6.06)                 | 0.0456  | 0.0664 |
| cg27241845 |                   | -3.88 (-5.87, -1.89)              | 0.0001   | -1.81 (-3.88, 0.26)               | 0.0873  | -0.10 (-2.92, 2.73)               | 0.9460  | -2.11 (-4.17, -0.04)              | 0.0458  | 0.0664 |
| cg08546016 | <i>TMEM104</i>    | -2.91 (-5.94, 0.12)               | 0.0594   | -3.83 (-6.86, -0.81)              | 0.0130  | 2.29 (-3.81, 8.39)                | 0.4614  | -2.48 (-5.15, 0.19)               | 0.0691  | 0.0977 |
| cg14817490 | <i>AHRR</i>       | -1.78 (-4.00, 0.43)               | 0.1149   | -1.82 (-4.08, 0.44)               | 0.1147  | 0.87 (-2.47, 4.21)                | 0.6111  | -1.31 (-2.74, 0.12)               | 0.0725  | 0.1001 |
| cg15459165 | <i>LAPTM5</i>     | 3.14 (-0.50, 6.78)                | 0.0913   | 1.17 (-2.30, 4.64)                | 0.5098  | 1.55 (-4.38, 7.48)                | 0.6084  | 2.02 (-0.29, 4.33)                | 0.0869  | 0.1172 |
| cg26286961 | <i>CSGALNACT1</i> | -1.88 (-3.76, -0.01)              | 0.0484   | -0.44 (-2.17, 1.30)               | 0.6197  | -0.22 (-2.86, 2.42)               | 0.8708  | -0.94 (-2.09, 0.21)               | 0.1079  | 0.1423 |
| cg13854219 |                   | -8.14 (-11.80, -4.48)             | 1.32E-05 | -1.25 (-4.82, 2.31)               | 0.4916  | -0.59 (-6.38, 5.20)               | 0.8418  | -3.54 (-8.57, 1.49)               | 0.1683  | 0.2122 |
| cg19459791 |                   | 4.00 (1.57, 6.42)                 | 0.0012   | 0.18 (-2.58, 2.94)                | 0.9001  | 0.83 (-3.25, 4.92)                | 0.6890  | 1.85 (-0.78, 4.47)                | 0.1677  | 0.2122 |
| cg25491402 | <i>PDE9A</i>      | 0.19 (-3.98, 4.37)                | 0.9278   | 2.63 (-1.65, 6.90)                | 0.2285  | 5.29 (-2.14, 12.72)               | 0.1630  | 1.93 (-0.85, 4.70)                | 0.1735  | 0.2141 |
| cg00285394 | <i>SQLE</i>       | -2.86 (-4.57, -1.14)              | 0.0011   | -0.91 (-2.86, 1.04)               | 0.3582  | 0.55 (-2.22, 3.32)                | 0.6972  | -1.29 (-3.18, 0.59)               | 0.1787  | 0.2159 |
| cg16503724 | <i>PLCL2</i>      | -1.67 (-5.22, 1.88)               | 0.3566   | -1.42 (-4.82, 1.98)               | 0.4128  | -0.37 (-5.77, 5.04)               | 0.8943  | -1.34 (-3.58, 0.90)               | 0.2404  | 0.2845 |
| cg01612140 |                   | -4.08 (-6.72, -1.45)              | 0.0024   | -0.69 (-3.27, 1.90)               | 0.6025  | 0.98 (-3.50, 5.46)                | 0.6673  | -1.58 (-4.44, 1.28)               | 0.2779  | 0.3161 |
| cg14085840 |                   | -5.56 (-9.77, -1.36)              | 0.0095   | -1.48 (-5.22, 2.26)               | 0.4392  | 2.11 (-4.53, 8.74)                | 0.5337  | -2.18 (-6.08, 1.73)               | 0.2745  | 0.3161 |
| cg21161138 | <i>AHRR</i>       | -3.94 (-6.32, -1.56)              | 0.0012   | -2.99 (-5.51, -0.46)              | 0.0204  | 2.75 (-0.68, 6.19)                | 0.1162  | -1.59 (-5.20, 2.03)               | 0.3895  | 0.4344 |
| cg10321156 |                   | -2.09 (-3.57, -0.61)              | 0.0058   | 0.58 (-0.96, 2.12)                | 0.4598  | -0.81 (-3.49, 1.88)               | 0.5562  | -0.78 (-2.60, 1.04)               | 0.4031  | 0.4411 |
| cg25763716 | <i>VCAMI</i>      | -4.35 (-7.71, -0.99)              | 0.0112   | 0.87 (-1.89, 3.63)                | 0.5372  | -0.94 (-6.89, 5.01)               | 0.7567  | -1.45 (-5.09, 2.18)               | 0.4336  | 0.4657 |
| cg14855367 | <i>UTS2D</i>      | -1.63 (-4.24, 0.99)               | 0.2231   | -0.51 (-3.15, 2.14)               | 0.7069  | 1.52 (-2.18, 5.23)                | 0.4198  | -0.55 (-2.21, 1.11)               | 0.5170  | 0.5452 |
| cg20732076 | <i>TRERF1</i>     | -4.01 (-7.46, -0.57)              | 0.0225   | 1.47 (-1.96, 4.90)                | 0.4011  | 0.07 (-6.00, 6.15)                | 0.9813  | -0.96 (-4.75, 2.83)               | 0.6196  | 0.6417 |
| cg25193885 | <i>SHANK2</i>     | 2.61 (-2.07, 7.28)                | 0.2743   | -2.77 (-7.29, 1.74)               | 0.2283  | 5.20 (-2.65, 13.04)               | 0.1943  | 1.05 (-3.49, 5.59)                | 0.6495  | 0.6609 |
| cg25285720 | <i>HLA-DMA</i>    | -2.79 (-8.95, 3.38)               | 0.3756   | 1.23 (-3.33, 5.79)                | 0.5968  | 5.11 (-3.40, 13.63)               | 0.2393  | 0.66 (-3.05, 4.36)                | 0.7288  | 0.7288 |

Abbreviations: CI, confidence interval; FDR, false discovery rate. <sup>a</sup>Model adjusted for age, sex, leukocyte composition, smoking status and alcohol consumption; estimated for changes (95% confidence interval) in frailty index expressed in % units per 10% units higher methylation level.

Abbreviations: CI, confidence interval; FDR, false discovery rate. <sup>a</sup>Model adjusted for age, sex, leukocyte composition, smoking status and alcohol consumption; estimated for changes (95% confidence interval) in frailty index expressed in % units per 10% units higher methylation level.

**Table S3. Associations of methylomic survival predictors and frailty index with all-cause mortality in the subset I and subset II.**

| Predictor                                   | HR (95% CI)          |                      |                      |                      |
|---------------------------------------------|----------------------|----------------------|----------------------|----------------------|
|                                             | Subset I (n=993)     |                      | Subset II (n=858)    |                      |
|                                             | Model 1 <sup>a</sup> | Model 2 <sup>b</sup> | Model 1 <sup>a</sup> | Model 2 <sup>b</sup> |
| MRscore <sup>c</sup> = 0                    | Ref                  | Ref                  | Ref                  | Ref                  |
| MRscore <sup>c</sup> = 1                    | 1.52 (0.90 – 2.55)   | 1.47 (0.88 – 2.48)   | 1.71 (1.01 – 2.90)   | 1.80 (1.04 – 3.11)   |
| MRscore <sup>c</sup> = 2-5                  | 2.36 (1.45 – 3.84)   | 2.19 (1.33 – 3.58)   | 2.13 (1.35 – 3.36)   | 1.95 (1.21 – 3.14)   |
| MRscore <sup>c</sup> = >5                   | 5.34 (3.01 – 9.48)   | 4.57 (2.54 – 8.20)   | 3.84 (2.25 – 6.56)   | 3.20 (1.85 – 5.53)   |
| cont.MRscore <sup>d</sup> (per 1 unit)      | 3.86 (2.56 – 5.83)   | 3.51 (2.28 – 5.40)   | 5.38 (3.32 – 8.71)   | 4.35 (2.64 – 7.17)   |
| Age acceleration <sup>e</sup> (per 5-years) | 1.09 (0.95 – 1.24)   | 0.96 (0.84 – 1.11)   | 1.25 (1.10 – 1.41)   | 1.12 (0.99 – 1.27)   |
| Frailty index (per 10%)                     | 1.27 (1.17 – 1.38)   | 1.26 (1.16 – 1.38)   | 1.26 (1.15 – 1.38)   | 1.20 (1.09 – 1.32)   |
| MRscore <sup>c</sup> (per SD)               | 1.65 (1.41 – 1.92)   | 1.58 (1.35 – 1.86)   | 1.59 (1.37 – 1.86)   | 1.52 (1.25 – 1.85)   |
| cont.MRscore <sup>d</sup> (per SD)          | 1.92 (1.57 – 2.34)   | 1.83 (1.49 – 2.26)   | 2.31 (1.82 – 2.94)   | 2.08 (1.62 – 2.66)   |
| Age acceleration <sup>e</sup> (per SD)      | 1.08 (0.95 – 1.23)   | 0.96 (0.84 – 1.10)   | 1.26 (1.11 – 1.43)   | 1.13 (0.99 – 1.28)   |
| Frailty index (per SD)                      | 1.42 (1.26 – 1.60)   | 1.42 (1.25 – 1.61)   | 1.41 (1.23 – 1.62)   | 1.31 (1.13 – 1.52)   |

Abbreviations: CI, confidence interval; cont.MRscore, continuous mortality risk score; HR, hazard ratio; MRscore, mortality risk score; Ref., reference category.

<sup>a</sup>Model 1: adjusted for age, sex, leukocyte composition (not for FI), smoking status and alcohol consumption; <sup>b</sup>Model 2: like model 1, results for MRscore/cont.MRscore additionally adjusted for epigenetic age acceleration and frailty index, results for epigenetic age acceleration, additionally adjusted for cont.MRscore and frailty index, and results for frailty index, additionally adjusted for cont.MRscore and epigenetic age acceleration; <sup>c</sup>MRscore based on aberrant methylation of 10 CpGs (cg01612140, cg05575921, cg06126421, cg08362785, cg10321156, cg14975410, cg19572487, cg23665802, cg24704287, cg25983901): 0-10 refer to simultaneously aberrant methylation at 0 to 10 CpGs. <sup>d</sup>cont.MRscore refers to a risk score computed through linear combination of weighted methylation values of the 10 CpGs. <sup>e</sup>Age acceleration estimated by the residuals of DNA methylation age (estimated using Horvath's algorithm) regressed on chronological age.

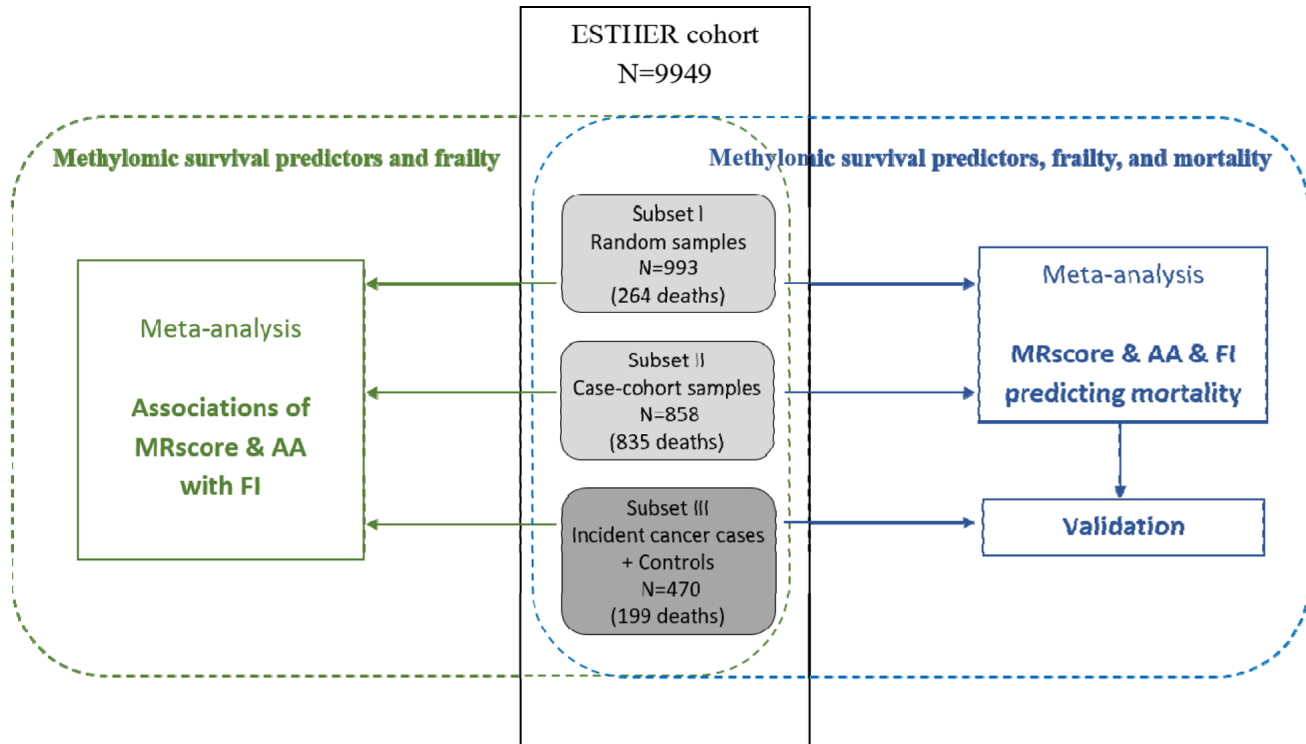

Figure S1. Study design and analysis flowchart.
